# Supplementary material
Source: MDPI journal article supplement (https://www.mdpi.com/2076-3417/11/18/8277)
Supplement: s1 [file s1]

## Supplementary Materials

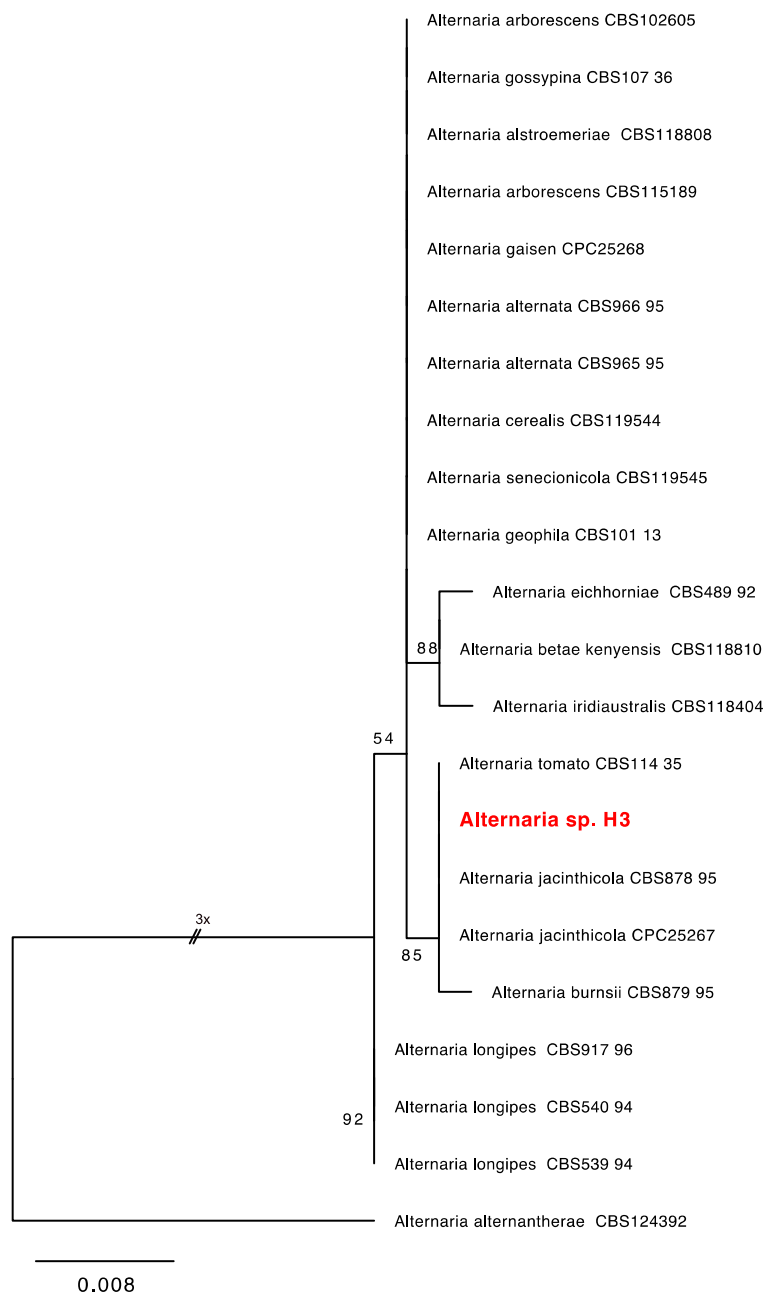

Figure S1: Phylogram generated from maximum likelihood analysis based on ITS sequence data of analysed *Alternaria* species. Isolates derived from this study are in red. The tree is rooted to *A. alternantherae* (CBS124392)

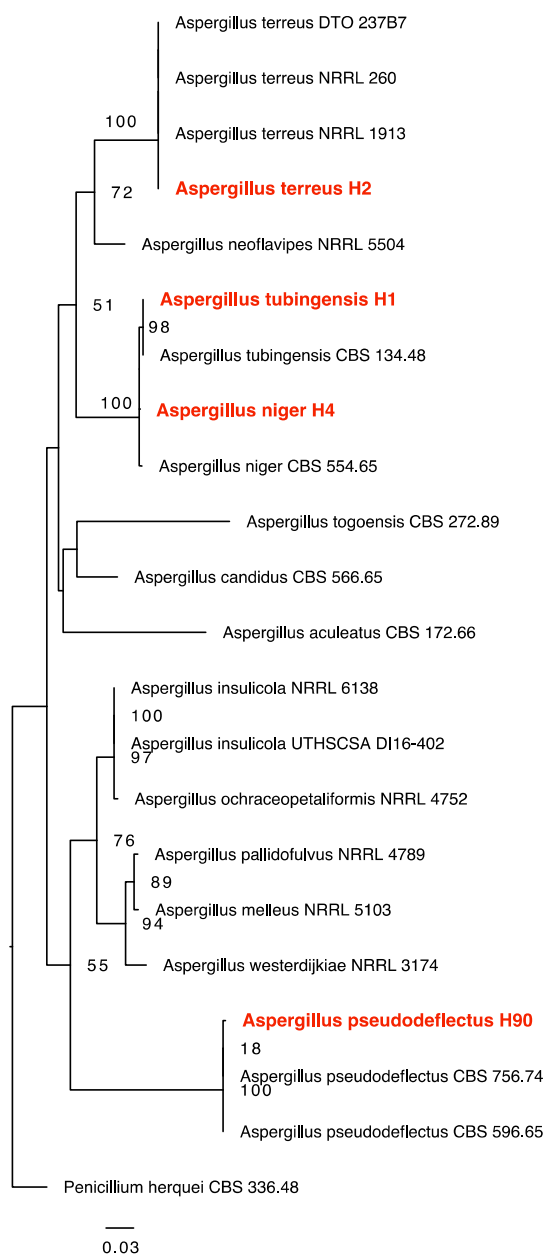

Figure S2: Phylogram generated from maximum likelihood analysis based on ITS sequence data of analysed *Aspergillus* species. Isolates derived from this study are in red. The tree is rooted to *Penicillium herquei* (CBS 336.48)

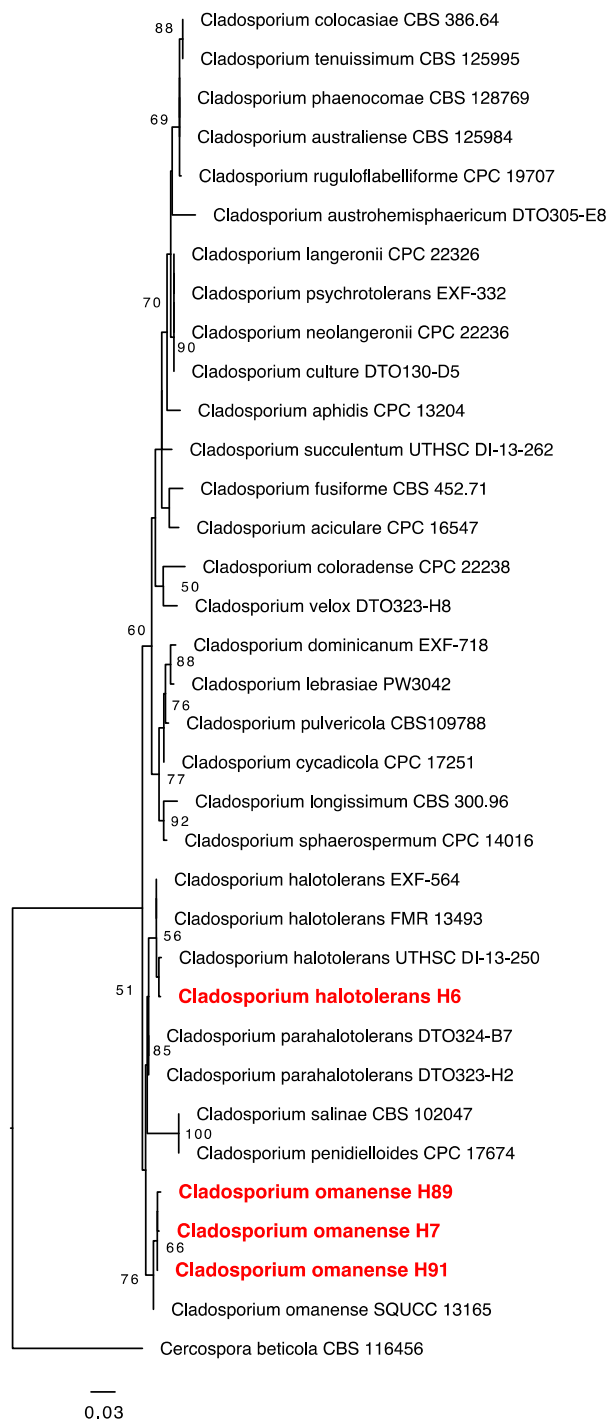

Figure S3: Phylogram generated from maximum likelihood analysis based on ITS sequence data of analysed *Cladosporium* species. Isolates derived from this study are in red. The tree is rooted to *Cercospora beticola* (CBS 116456).

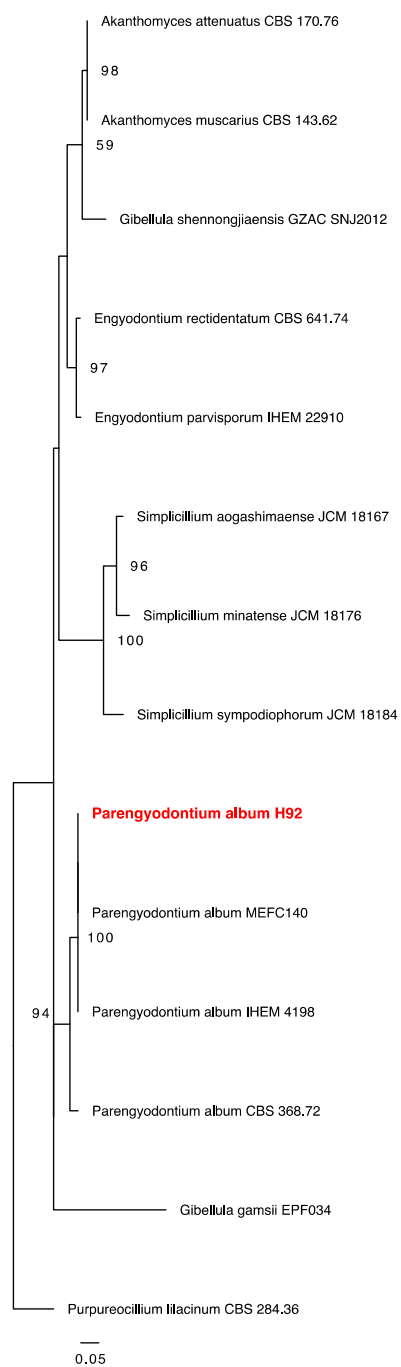

Figure S4: Phylogram generated from maximum likelihood analysis based on ITS sequence data of analysed *Parengyodontium* species. Isolates derived from this study are in red. The tree is rooted to *Purpureocillium lilacinum* (CBS 284.36).
